# Supplementary material for: Microwave assisted synthesis and magnetic properties of octanuclear and enneanuclear Ni(ii) complexes: an unprecedented coordination mode for the NO2− ligand
Source: Royal Society of Chemistry journal article supplement (doi:10.1039/c1dt10993f), 2011-01-01
Supplement: c1dt10993f.pdf [file c1dt10993f.pdf]

## **Supplementary Information**

### **Microwave assisted synthesis and magnetic properties of an enneanuclear Ni(II) complex**

**Alba Pons, Nicoleta Ionanidis, Akira Yamaguchi, Wolfgang Wernsdorfer and E. Carolina Sañudo\***

#### **Contents:**

Figure S1

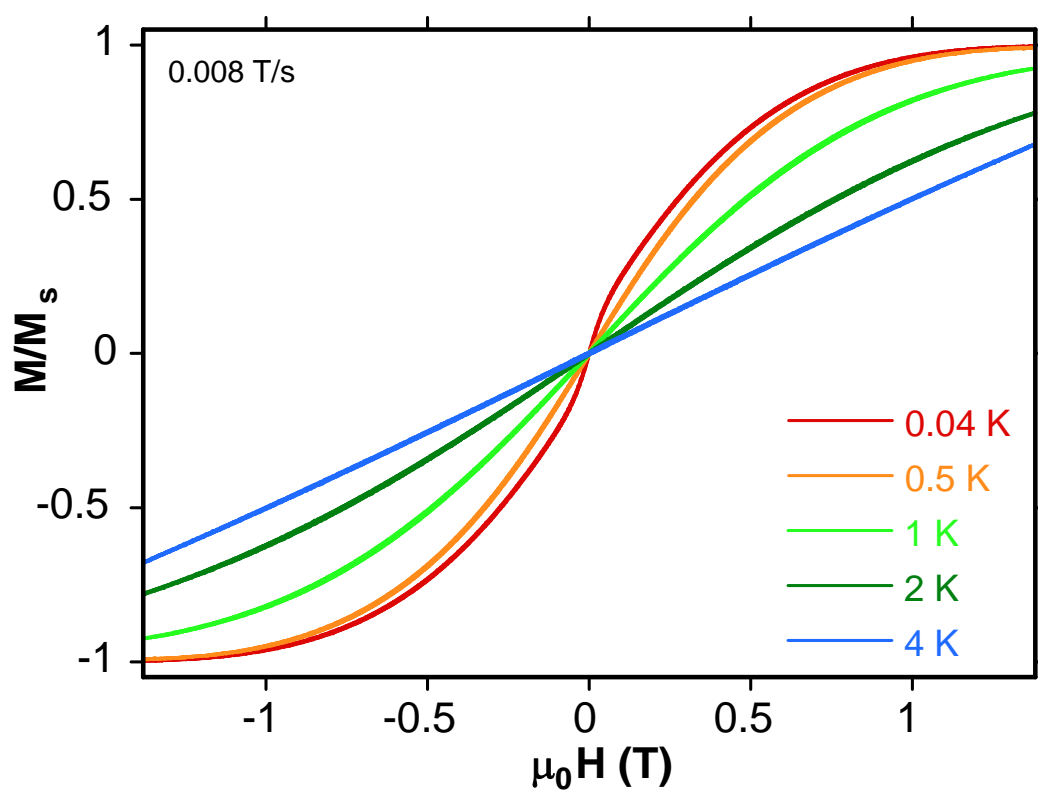

**Figure S1.** Magnetization vs. field plot for complex **1** at 0.008 T/s scan rate and several temperatures.
